# Supplementary material
Source: MDPI journal article supplement (https://www.mdpi.com/2673-4125/1/2/14)
Supplement: s1 [file s1]

*Supplementary Materials*

# Energy Dissipation Hypothesis Applied to Enhance the Affinity of Thrombin Binding Aptamer

Gleb Zhdanov <sup>1</sup>, Alexander Arutyunyan <sup>2</sup>, Alexey Kopylov <sup>1</sup> and Elena Zavyalova <sup>1,\*</sup>

<sup>1</sup> Chemistry Department of Lomonosov Moscow State University, 119991 Moscow, Russia; gleb.zhdanov@chemistry.msu.ru (G.Z.); kopylov.ale@gmail.com (A.K.)

<sup>2</sup> Belozersky Research Institute of Physical Chemical Biology, Lomonosov Moscow State University, 119991 Moscow, Russia; alarut@genebee.msu.ru

\* Correspondence: zlenka2006@gmail.com

**Citation:** Zhdanov, G.; Arutyunyan, A.; Kopylov, A.; Zavyalova, E. Energy Dissipation Hypothesis Applied to Enhance the Affinity of Thrombin Binding Aptamer. *Biophysica* **2021**, *1*, 179–193. <https://doi.org/10.3390/biophysica1020014>

Academic Editor: Danilo Milardi

Received: 20 April 2021

Accepted: 12 May 2021

Published: 14 May 2021

**Publisher's Note:** MDPI stays neutral with regard to jurisdictional claims in published maps and institutional affiliations.

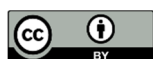

**Copyright:** © 2021 by the authors. Licensee MDPI, Basel, Switzerland. This article is an open access article distributed under the terms and conditions of the Creative Commons Attribution (CC BY) license (<https://creativecommons.org/licenses/by/4.0/>).

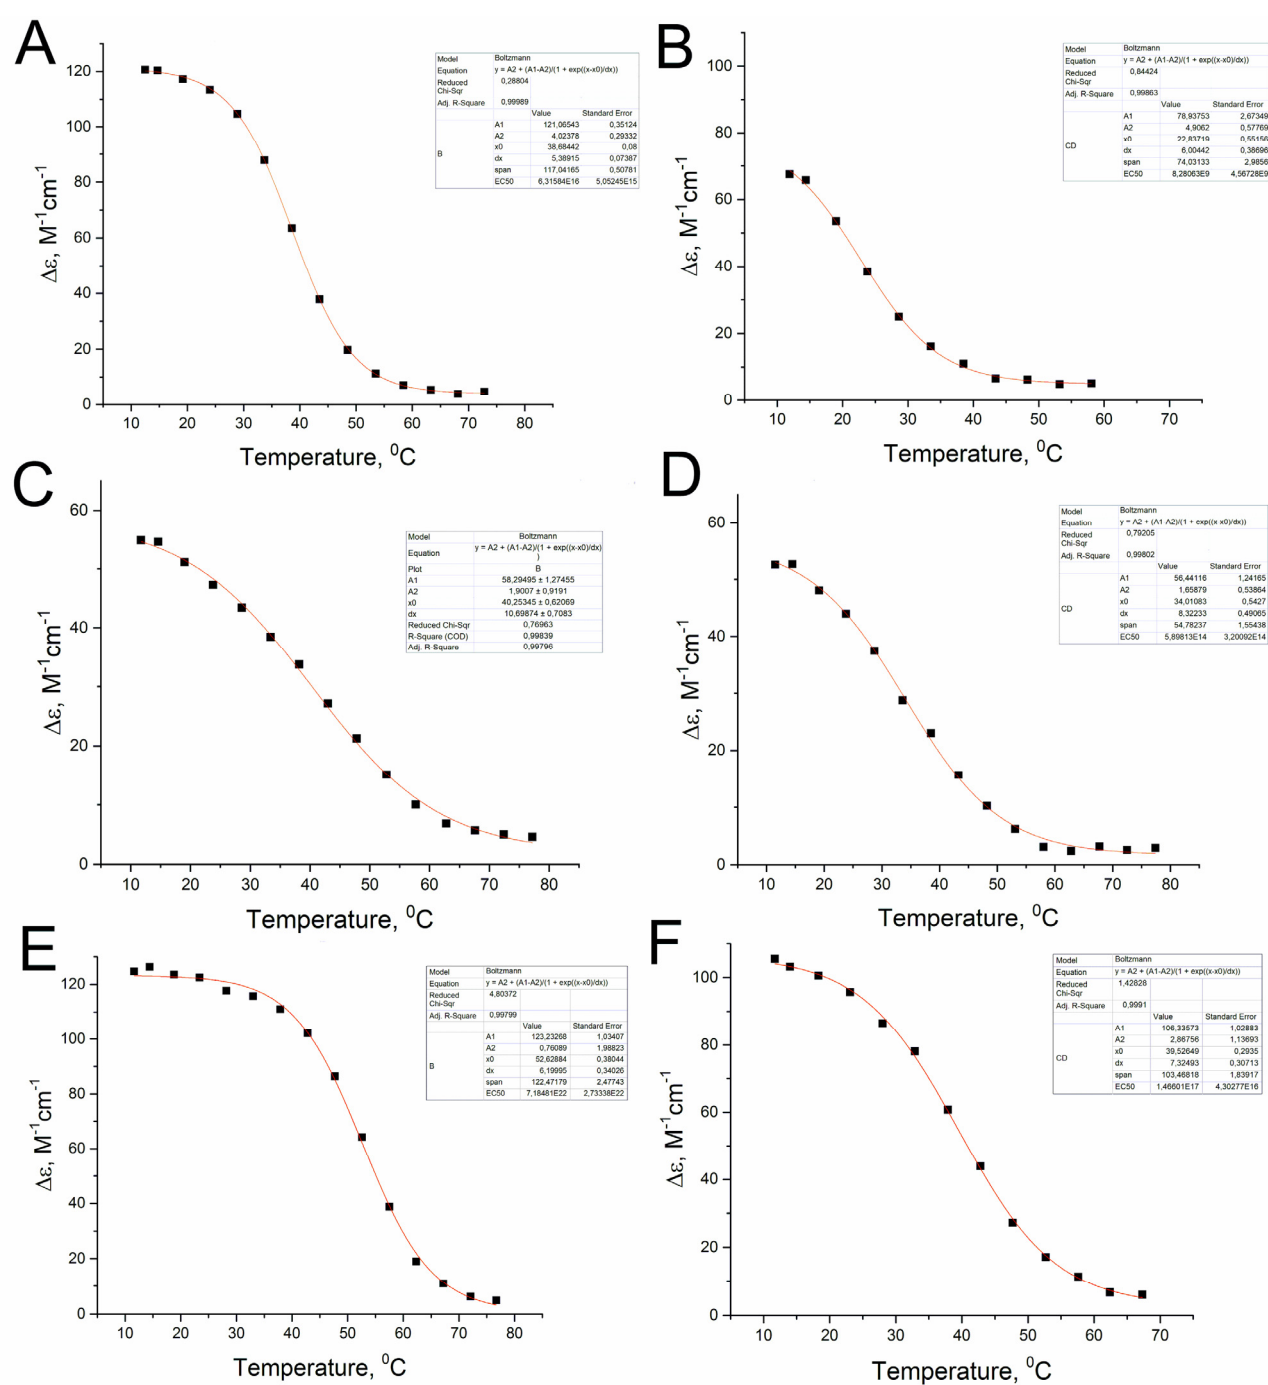

**Figure S1.** Melting curves of G-quadruplexes acquired from circular dichroism spectra at wavelength of 295 nm. A – K<sup>+</sup>-coordinated HD1; B – Na<sup>+</sup>-coordinated HD1; C – K<sup>+</sup>-coordinated carboxy-T4,T13-HD1; D – Na<sup>+</sup>-coordinated carboxy-T4,T13-HD1; E – K<sup>+</sup>-coordinated biotinylated-T4,T13-HD1; F – Na<sup>+</sup>-coordinated biotinylated-T4,T13-HD1.

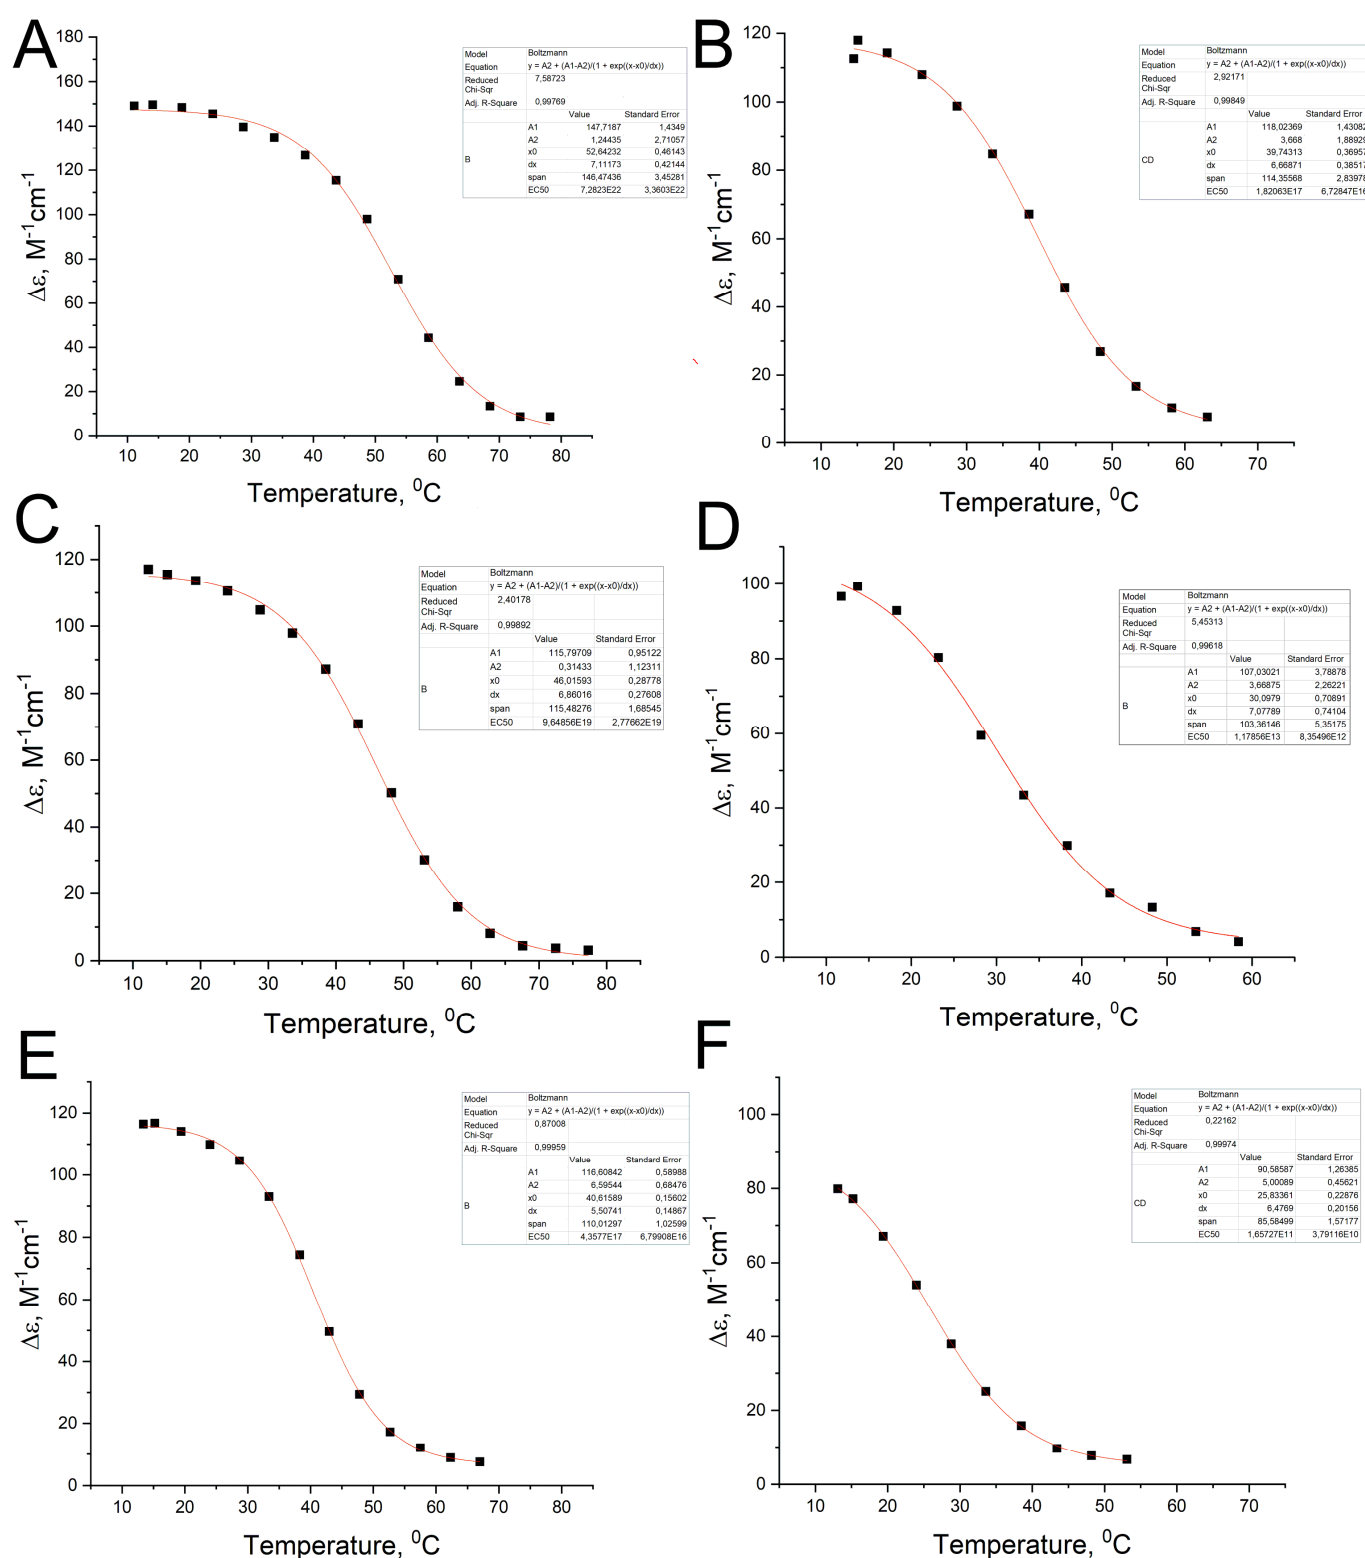

**Figure S2.** Melting curves of G-quadruplexes acquired from circular dichroism spectra at wavelength of 295 nm. A – K<sup>+</sup>-coordinated amino-T4,T13-HD1; B – Na<sup>+</sup>-coordinated amino-T4,T13-HD1; C – K<sup>+</sup>-coordinated amino-T13-HD1; D – Na<sup>+</sup>-coordinated amino-T13-HD1; E – K<sup>+</sup>-coordinated amino-T3,T12-HD1; F – Na<sup>+</sup>-coordinated amino-T3,T12-HD1.

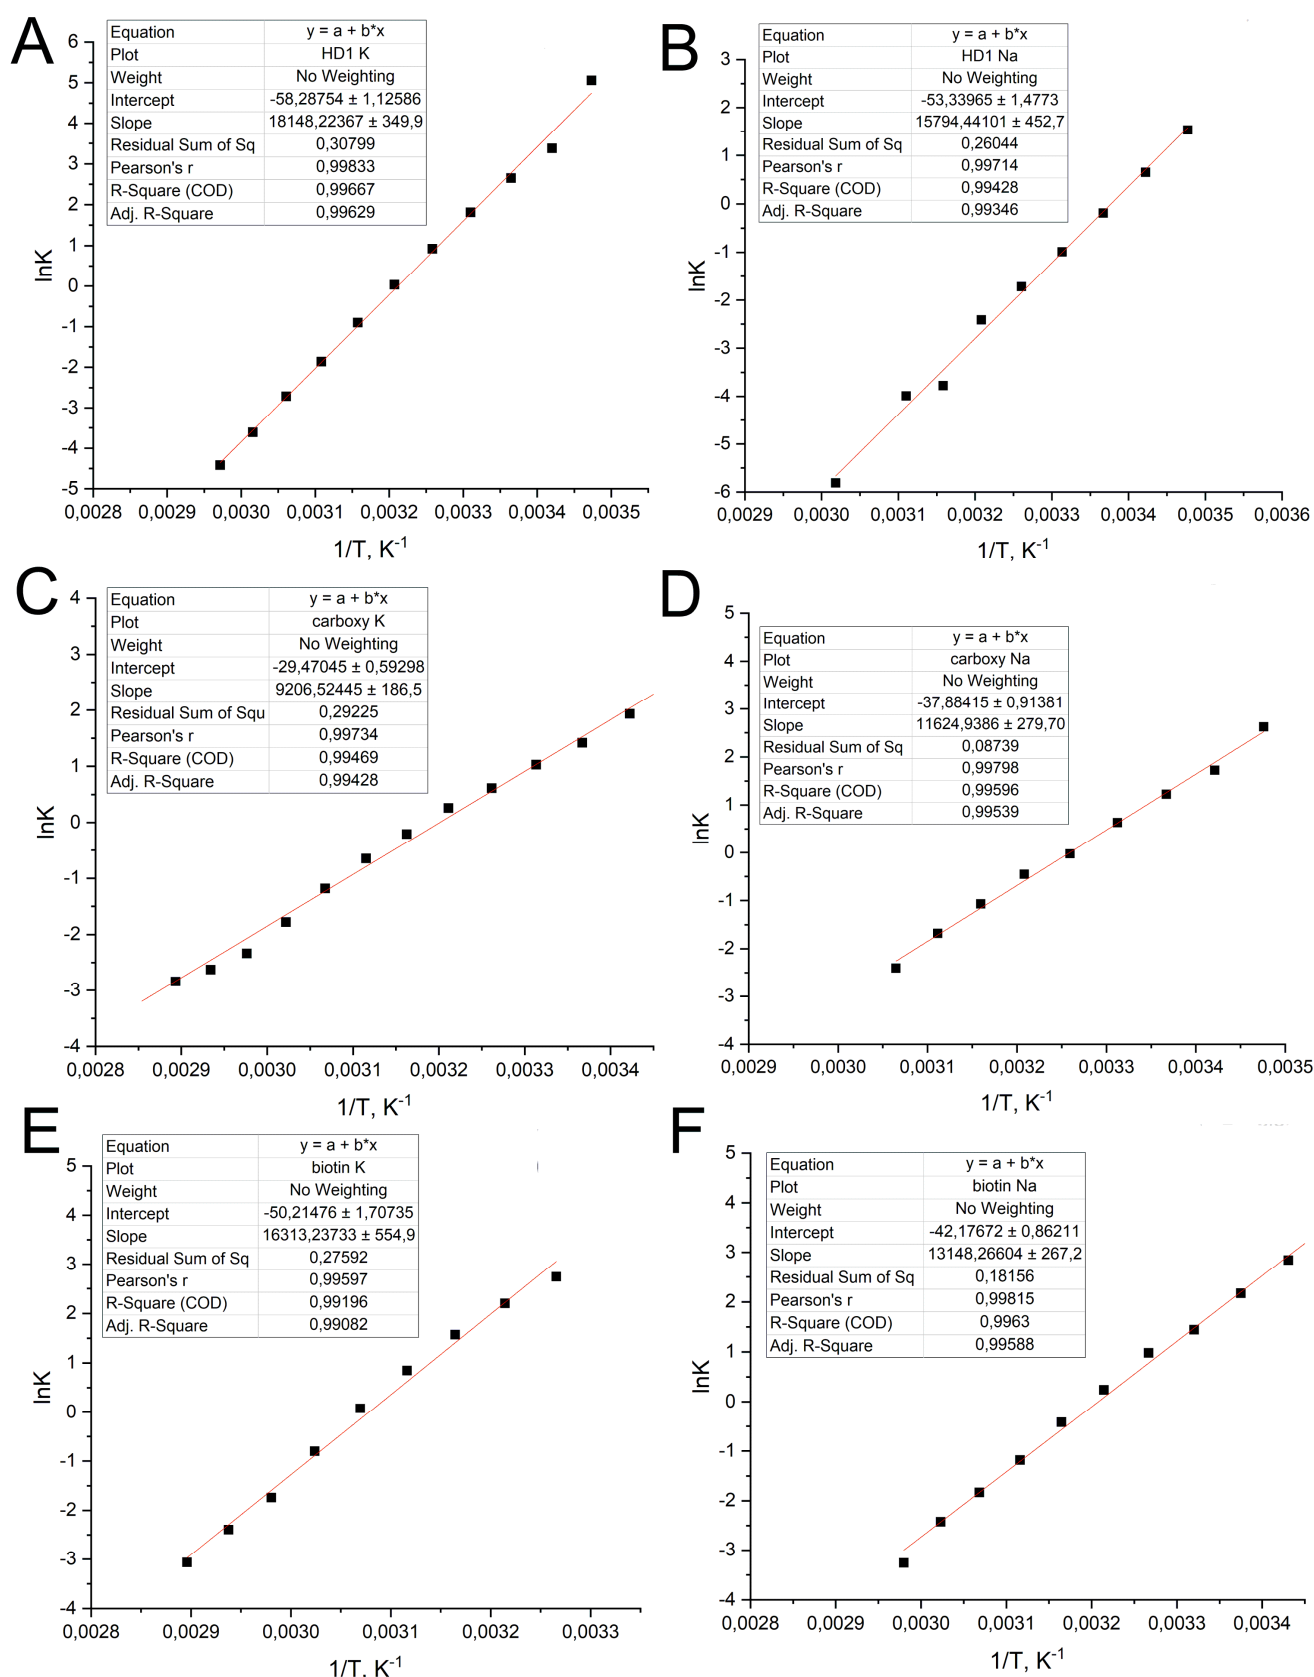

**Figure S3.** Linearization of melting curves in the coordinates  $\ln K(1/T)$  used for the calculations of thermodynamic parameters. A – K+-coordinated HD1; B – Na+-coordinated HD1; C – K+-coordinated carboxy-T4,T13-HD1; D - Na+-coordinated carboxy-T4,T13-HD1; E – K+-coordinated biotinylated-T4,T13-HD1; F – Na+-coordinated biotinylated-T4,T13-HD1.

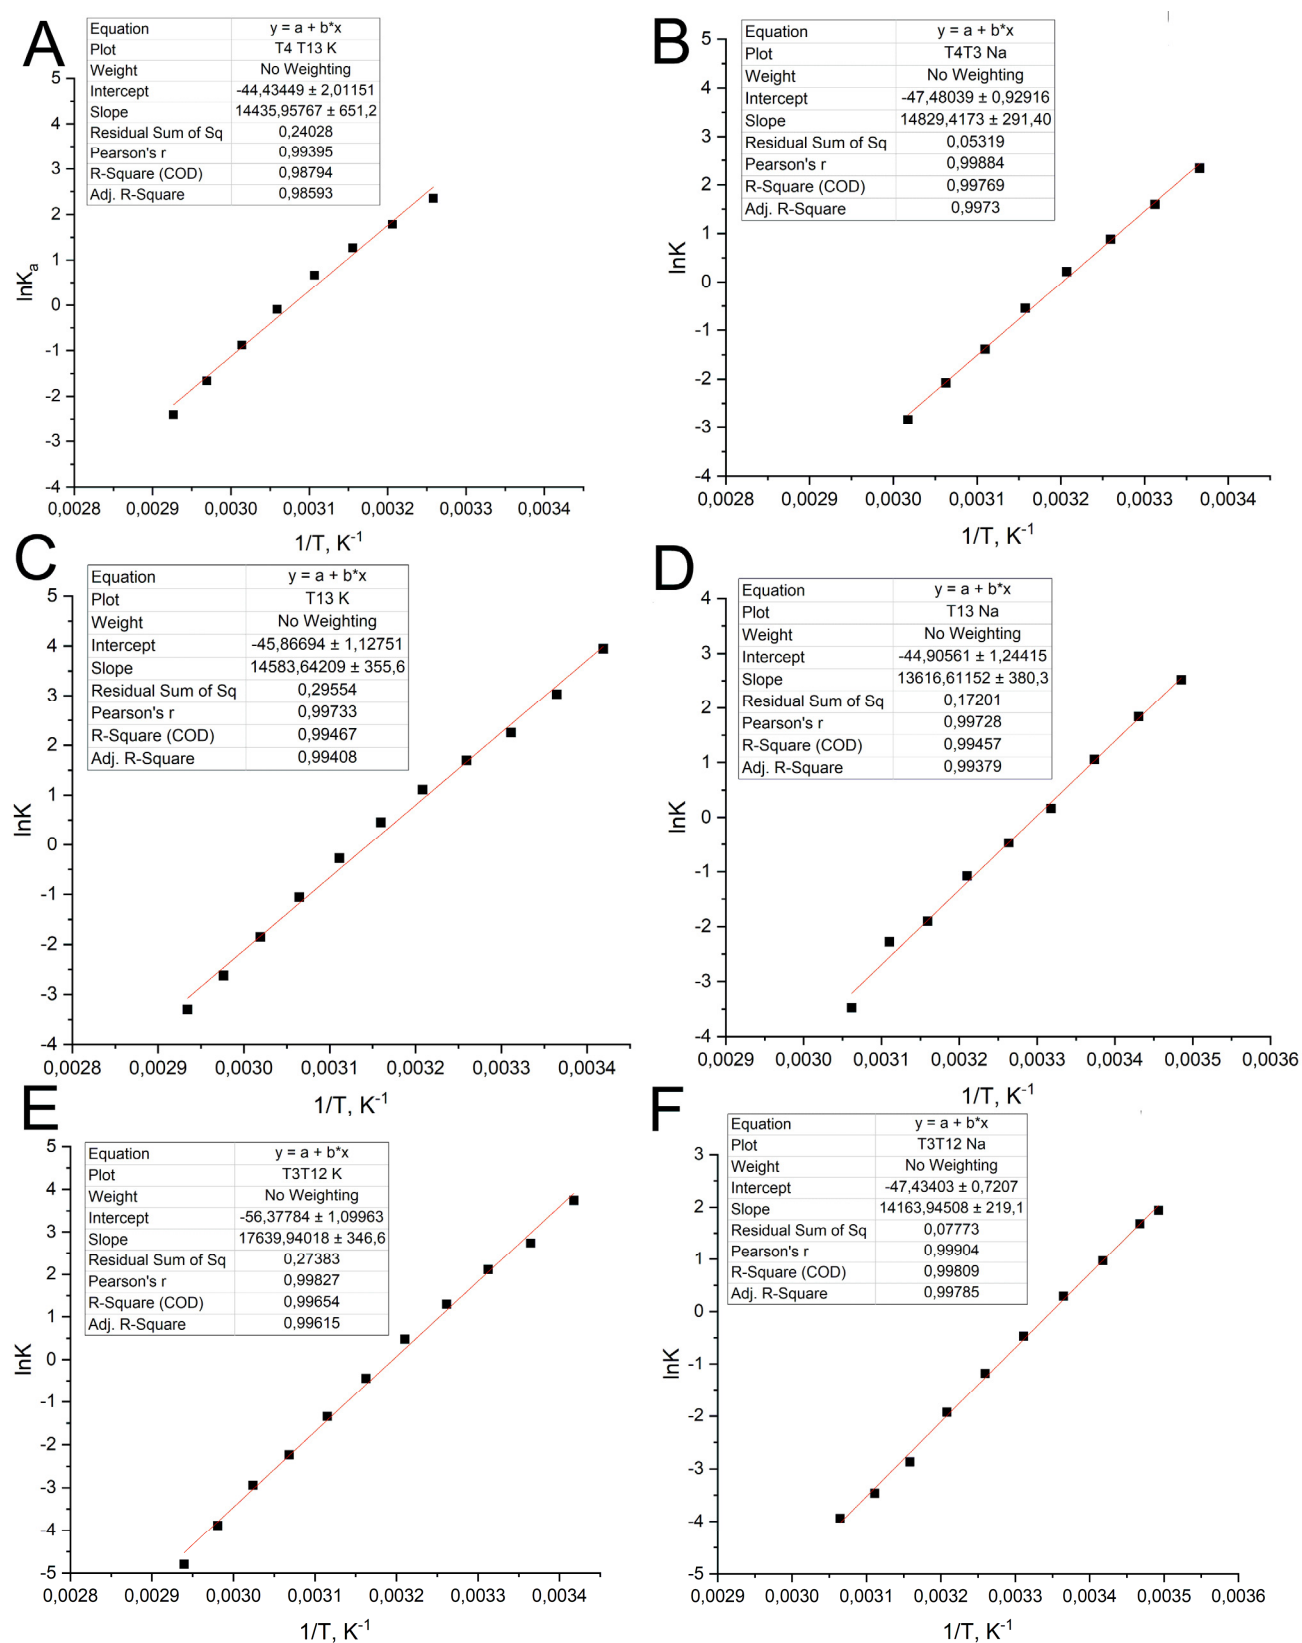

**Figure S4.** Linearization of melting curves in the coordinates  $\ln K(1/T)$  used for the calculations of thermodynamic parameters. A – K+-coordinated amino-T4,T13-HD1; B – Na+-coordinated amino-T4,T13-HD1; C – K+-coordinated amino-T13-HD1; D – Na+-coordinated amino-T13-HD1; E – K+-coordinated amino-T3,T12-HD1; F – Na+-coordinated amino-T3,T12-HD1.
